# Supplementary material for: STAT3 governs hyporesponsiveness and granzyme B-dependent suppressive capacity in human CD4+ T cells
Source: PubMed Central journal article supplement (PMC4422363; doi:10.1096/fj.14-257584), 2014-11-14
Supplement: supp_fj.14-257584_Supplemental_Figure1.pdf [file supp_fj.14-257584_Supplemental_Figure1.pdf]

### Supplemental Figure S1

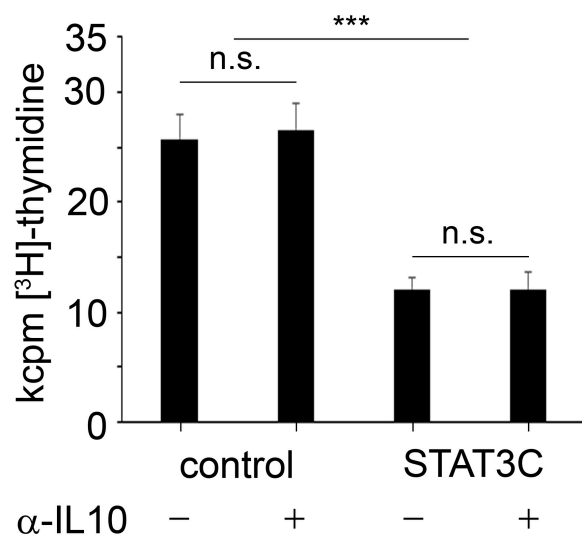

**SUPPLEMENTAL FIGURE S1. STAT3C-mediated hyporesponsiveness is independent of IL-10 production.** Proliferation of control-vector or STAT3C-transduced CD4<sup>+</sup> T-cells in response to anti-CD3/anti-CD28 stimulation in the absence or presence of an IL-10 neutralizing antibody (20 µg/mL). Mean proliferation + SD from one representative donor (n=3) are shown; n.s. not significant, \*\*\* p<0.001
