# Supplementary material for: STAT3 governs hyporesponsiveness and granzyme B-dependent suppressive capacity in human CD4+ T cells
Source: PubMed Central journal article supplement (PMC4422363; doi:10.1096/fj.14-257584), 2014-11-14
Supplement: supp_fj.14-257584_Supplemental_Figure3.pdf [file supp_fj.14-257584_Supplemental_Figure3.pdf]

### Supplemental Figure S3

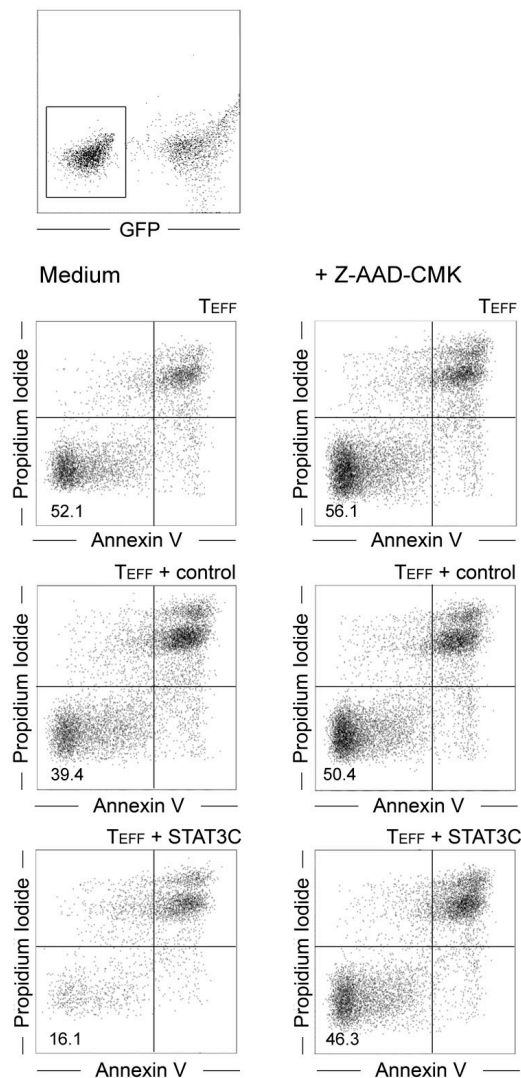

**SUPPLEMENTAL FIGURE S3. Granzyme B-dependent induction of cell death conferred by STAT3<sup>+</sup> T-cells.** Viability of GFP-negative T<sub>EFF</sub> was determined upon coculture with the indicated T-cells in the absence (left panel) or presence (right panel) of the granzyme B inhibitor Z-AAD-CMK by flow cytometry by quantification of cells negative for annexin V and propidium iodide. Numbers indicate percentage of viable cells in respective quadrant. Figure shows one representative experiments out of 6 performed.
